Deeply conserved susceptibility in a multi-host, multi-parasite system

Lisa N. Barrow<sup>1,2,\*</sup>, Sabrina M. McNew<sup>1,3,4</sup>, Nora Mitchell<sup>1</sup>, Spencer C. Galen<sup>1,5,6</sup>, Holly L. Lutz<sup>4,7,8</sup>, Heather Skeen<sup>7,9</sup>, Thomas Valqui<sup>10</sup>, Jason D. Weckstein<sup>6,7</sup>, Christopher C. Witt<sup>1,2,\*</sup>

<sup>1</sup>Museum of Southwestern Biology, University of New Mexico, Albuquerque, NM 87131, USA

<sup>2</sup>Department of Biology, University of New Mexico, Albuquerque, NM 87131, USA

<sup>3</sup>Department of Biology, University of Utah, Salt Lake City, UT 84112-0840, USA

<sup>4</sup>Cornell Lab of Ornithology, Cornell University, Ithaca, NY, USA

<sup>5</sup>Sackler Institute for Comparative Genomics & Richard Gilder Graduate School, American Museum of Natural History, New York, NY 10024, USA

<sup>6</sup>Department of Ornithology, Academy of Natural Sciences of Drexel University and Department of Biodiversity, Earth, and Environmental Sciences, Drexel University, Philadelphia, PA 19103, USA

<sup>7</sup>Integrative Research Center, The Field Museum, Chicago, IL 60605, USA

<sup>8</sup>Department of Surgery, University of Chicago, Chicago, IL, 60637, USA

<sup>9</sup>Committee on Evolutionary Biology, University of Chicago, Chicago, IL 60637, USA

<sup>10</sup>Centro de Ornitología y Biodiversidad (CORBIDI), Lima, Perú

\*Correspondence: Lisa N. Barrow (lbarrow@unm.edu) and Christopher C. Witt (cwitt@unm.edu); Department of Biology, 219 Yale Blvd NE, MSC03 2020, 1 University of New Mexico, Albuquerque NM, 87131-0001, USA

**Keywords:** *Haemoproteus*, *Leucocytozoon*, *Plasmodium*, Haemosporida, Apicomplexa, avian malaria, comparative methods, phylogenetic signal, Peru, Andes

*Statement of authorship:* LNB, SMM, NM, and CCW designed the study; SMM, SCG, HLL, HS, TV, JDW, and CCW collected the data; LNB and NM analyzed the data; LNB, NM, and CCW wrote the paper with input from all authors.

*Data accessibility statement:* Specimen information is available from the Arctos database (arctosdb.org) and in supplementary tables (Appendix S1). Files used for analysis will be archived in Dryad. DOI: XXX.

## PHYLO-CONSERVATISM OF ECOLOGICAL INTERACTIONS

### 1 **Abstract**

2 Variation in susceptibility is ubiquitous in multi-host, multi-parasite assemblages, and can have  
3 profound implications for ecology and evolution. The extent to which susceptibility is  
4 phylogenetically conserved among hosts is poorly understood and has rarely been appropriately  
5 tested. We screened for haemosporidian parasites in 3983 birds representing 40 families and 523  
6 species, spanning ~4500 meters elevation in the tropical Andes. To quantify the influence of host  
7 phylogeny on infection status, we applied Bayesian phylogenetic multilevel models that included  
8 a suite of environmental, spatial, temporal, life history, and ecological predictors. We found  
9 evidence of deeply-conserved susceptibility across the avian tree; host phylogeny explained  
10 substantial variation in infection rate, and results were robust to phylogenetic uncertainty. Our  
11 study suggests that susceptibility is governed, in part, by conserved, latent aspects of anti-  
12 parasite defense. This demonstrates the importance of deep phylogeny for understanding the  
13 outcomes of present-day ecological interactions.

14

## 15 INTRODUCTION

16 Susceptibility to parasites and pathogens can affect the fitness of individuals, the  
17 structure of communities, and the evolutionary success of lineages. Therefore, the causes of  
18 variation in susceptibility among hosts are of paramount importance to ecology and evolution.  
19 Host individuals may vary in susceptibility because of differences in exposure or defense (Gaunt  
20 1995; Barrett *et al.* 2009; Savage *et al.* 2011; Atkinson *et al.* 2013). Host species also vary in  
21 susceptibility (Power & Mitchell 2004; Searle *et al.* 2011), and interspecific variation can be  
22 explained, in part, by variation in aspects of life history, morphology, environment, and behavior  
23 (Scheuerlein & Ricklefs 2004; Garamszegi & Møller 2012; Johnson *et al.* 2012; Lutz *et al.*  
24 2015). Additional interspecific variation may be explained by unique 'species effects' (e.g.,  
25 Pulgarín-R *et al.* 2018; Ricklefs *et al.* 2018), attributable to unique, derived species traits, such as  
26 molecular genetic aspects of the immune system (Martin *et al.* 2005; Ellison *et al.* 2015).

27 The extent to which susceptibility to parasites shows a conserved pattern of evolution  
28 across the host phylogeny has seldom been addressed. If susceptibility is conserved, it would  
29 indicate that the real-time outcome of an ecological interaction is partly contingent on deep-time  
30 evolutionary history. Parasites can affect host biogeography, macroevolution, and community  
31 assembly (Holt 1977; van Riper *et al.* 1986; Hatcher *et al.* 2006; Bradley *et al.* 2008, Holt &  
32 Bonsall 2017), and it follows that conserved susceptibility could constrain phylogenetic  
33 community structure and contribute to conserved rates of speciation, extinction, or secondary  
34 sympatry. From a broad perspective, parasite clades tend to have phylogenetic limits to their host  
35 ranges. For example, haemosporidian parasite genera tend to infect vertebrate hosts in a single  
36 class or subclass (Galen *et al.* 2018). Paired host and parasite clades can form dynamic multi-  
37 host, multi-parasite assemblages, with host-parasite linkages proliferating by host-switching

PHYLO-CONSERVATISM OF ECOLOGICAL INTERACTIONS

38 (Ricklefs *et al.* 2004; Doña *et al.* 2018; Fecchio *et al.* 2018). Host-switching can occur across  
39 large phylogenetic gaps within these host and parasite clades (Anderson 2000; Beadell *et al.*  
40 2009; Ricklefs *et al.* 2014; Suh *et al.* 2016), indicating deeply conserved compatibility. The key  
41 question we address in this paper concerns the extent to which host species exhibit  
42 phylogenetically conserved patterns of susceptibility within a multi-host, multi-parasite  
43 assemblage.

44 One possibility is that susceptibility is labile rather than phylogenetically conserved  
45 across the extent of multi-host, multi-parasite systems. Under this 'lability hypothesis', variation  
46 in susceptibility would be entirely attributable to host species, populations, and individuals.  
47 There are at least four lines of supporting evidence for the lability hypothesis. First, temporal and  
48 spatial variation in parasite pressure is profound (Bennett & Cameron 1974; Merilä *et al.* 1995;  
49 Svensson-Coelho *et al.* 2013). Second, aspects of host ecological and behavioral niches tend to  
50 evolve quickly (Blomberg *et al.* 2003; Schreeg *et al.* 2010; Zhang *et al.* 2017), and these can  
51 have substantial effects on exposure to parasite vectors (Garvin & Remsen 1997; Walther *et al.*  
52 1999; Scheuerlein & Ricklefs 2004). Third, simple regulatory or structural genetic changes in the  
53 immune system can increase or eliminate susceptibility over short time-scales, as suggested by  
54 rapid changes in host compatibility over a few generations (Woodworth *et al.* 2005;  
55 Decaestecker *et al.* 2007), and variation in host-parasite associations among adjacent island  
56 populations (Fallon *et al.* 2003, 2004, 2005; Ricklefs *et al.* 2011; Soares *et al.* 2017). Fourth,  
57 simple innate immune changes can occur in parallel between distantly related host lineages, with  
58 identical effects on susceptibility. Such a parallel change occurred in the sialic acid pathway of  
59 the ancestors of humans and owl monkeys, respectively, causing an eclectic phylogenetic  
60 distribution of susceptibility to the haemosporidian parasite, *Plasmodium falciparum* (Martin *et*

PHYLO-CONSERVATISM OF ECOLOGICAL INTERACTIONS

61 *al.* 2005). In sum, the evidence for short-term and spatial variation in exposure and host  
62 defensive ability suggests that we should find no signal of phylogenetically conserved  
63 susceptibility across the host phylogeny.

64         Alternatively, we may expect phylogenetically conserved susceptibility in multi-host,  
65 multi-parasite systems either because of conserved host traits or phylogenetic constraints on  
66 parasite host range and host-switching. Many host traits that have previously been shown to  
67 affect interspecific variation in susceptibility also tend to show phylogenetic signal. These  
68 include embryonic development rates (Ricklefs 1992; Ricklefs *et al.* 2018), diet (Masello *et al.*  
69 2018), nesting habits (Lutz *et al.* 2015), and environmental niche characteristics such as habitat  
70 and elevation (González *et al.* 2014). It remains to be adequately tested whether additional  
71 variation in susceptibility can be explained by the phylogenetic history of host species, even after  
72 taking other causes into account. Such a finding would imply that susceptibility itself is  
73 conserved, perhaps due to specific molecular genetic aspects of the host immune system, or other  
74 hidden causes. On the other hand, apparent variation in susceptibility among host species could  
75 simply be caused by variable numbers of compatible parasites, with higher prevalence expected  
76 for host species with richer parasite assemblages (Arriero & Møller 2008).

77         Parasite or pathogen species tend to exhibit host ranges that are phylogenetically limited,  
78 with lower infectivity, virulence, and disease intensity at increasing phylogenetic distances from  
79 the most frequently infected host species (Tinsley & Majerus 2007; de Vienne *et al.* 2009;  
80 Russell *et al.* 2009; Gilbert *et al.* 2015). This phylogenetic host-range effect has been  
81 demonstrated experimentally in fungal pathogens of plants (Gilbert & Webb 2007), rhizobial  
82 bacteria of Acacia trees (Barrett *et al.* 2016), and RNA-viruses of *Drosophila* (Longdon *et al.*  
83 2011). Patterns of hematozoon presence-absence in New World primates also suggest a

## PHYLO-CONSERVATISM OF ECOLOGICAL INTERACTIONS

84 phylogenetic host-range effect (Davies & Pedersen 2008). This effect can mediate the rate and  
85 phylogenetic pattern of host-switching. The frequency of host-switching tends to be inversely  
86 proportional to the phylogenetic distance between donor and recipient host species for bat  
87 viruses (Streicker *et al.* 2010), primate lentiviruses (Charleston & Robertson 2002), plant fungal  
88 pathogens (Gilbert *et al.* 2012), and the haemosporidian-bird system that is the focus of this  
89 study (Clark & Clegg 2017). Thus, the phylogenetic distance effect appears to be a shared  
90 evolutionary feature of multi-host, multi-parasite systems.

91       Infection status of individuals, or infection rates of populations, provide an index of  
92 susceptibility. Some evidence of phylogenetic signal or taxonomic clade effects on infection rate  
93 has been found previously for protozoan parasites (Scheuerlein & Ricklefs 2004; Svensson-  
94 Coelho *et al.* 2013; González *et al.* 2014; Waxman *et al.* 2014; Lutz *et al.* 2015; Fecchio *et al.*  
95 2017b), but no previous analysis has estimated phylogenetic effects while taking other relevant  
96 predictors of infection into account. This approach is essential to understanding whether  
97 susceptibility is truly conserved or simply appears conserved because shared environments or life  
98 history characteristics among related species affect infection rates. Here, we quantified  
99 phylogenetic effects on infection rate while taking into account environmental, spatial, temporal,  
100 individual, and species-level variation that could contribute to infection risk. We surveyed  
101 haemosporidians from the world's most diverse avifauna, at the juncture of the Amazon basin  
102 and tropical Andes, including 40 host families, 523 host species, 3983 host individuals, 1678  
103 haemosporidian infections, and 144 localities, spanning ~7 degrees of latitude, and ~4500 meters  
104 in elevation. We used phylogenetic mixed models to explicitly estimate the proportion of  
105 variance that is attributable to phylogeny and species identity, respectively. We found deeply-

106 conserved patterns of susceptibility to haemosporidian parasites across the avian tree,  
107 demonstrating that deep phylogeny matters to real-time ecological interactions.

108

## 109 **MATERIAL AND METHODS**

### 110 **Sampling and individual specimen data**

111 We collected bird specimens in the Andes Mountains and adjacent lowlands (elevational  
112 range: 115–4,637 meters; Fig. 1a) in accordance with animal care guidelines and appropriate  
113 permits. Specimens and tissues are housed at the Museum of Southwestern Biology, the Field  
114 Museum of Natural History, and el Centro de Ornitología y Biodiversidad. Specimen-related  
115 data are available on the ARCTOS database ([arctosdb.org](http://arctosdb.org)) and in Table S1 of Supporting  
116 Information. Elevation, latitude, longitude, sex, body mass, and date were recorded for each  
117 specimen at the time of collection. To account for site variation in climate, we extracted 19  
118 bioclimatic variables describing aspects of temperature and precipitation from the WorldClim  
119 database (Hijmans *et al.* 2005) based on the geographic coordinates for each specimen.

120

### 121 **Species-level ecological and life history traits**

122 For each of the 523 host species, we compiled data for ecological and life history traits  
123 thought to influence haemosporidian infection status (Table S2). We obtained foraging stratum  
124 and relative abundance from the reference database published for Neotropical birds (Parker *et al.*  
125 1996). Foraging stratum was converted to a continuous variable, with higher values indicating  
126 higher strata (1 = terrestrial, 9 = aerial). For relative abundance, we classified species into three  
127 categories: common (C), fairly common (F), or uncommon/rare (U). The remaining traits (nest  
128 type, nest height, plumage dimorphism, sociality, uniparental care, cooperative breeding,

## PHYLO-CONSERVATISM OF ECOLOGICAL INTERACTIONS

129 lekking, and colonial nesting/roosting) were inferred from del Hoyo *et al.* (2018) and other  
130 secondary sources. We categorized nest type as either “open” or “closed” (including cavities,  
131 domes, or nests in caves), and nest height as either “ground”, “low” ( $\leq 3$  meters), or “high” ( $> 3$   
132 meters). Plumage dimorphism was classified as “none”, “moderate”, or “striking”. We  
133 categorized sociality into “solitary” (foraging alone or in pairs), “family” (family groups only),  
134 “single species” (larger groups of the same species), or “flocking” (regularly occurring in mixed  
135 species flocks). Uniparental care, cooperative breeding, lekking, and colonial nesting/roosting  
136 were classified as either “yes” or “no”. When breeding information was unavailable, we inferred  
137 the state of these traits from related species.

138

### 139 **Assigning infection status**

140 For each bird, we determined infection status for all haemosporidian genera combined  
141 (overall infection), and for each genus separately (*Haemoproteus*, *Plasmodium*, and  
142 *Leucocytozoon*). We extracted DNA from tissue or blood using QIAGEN kits, and used nested  
143 PCR to amplify 478 bp of *cytb*, a mitochondrial gene (Hellgren *et al.* 2004; Waldenström *et al.*  
144 2004; Galen & Witt 2014). PCR products were visualized on agarose gels to identify infected  
145 samples, which were then sequenced in both directions. To identify haemosporidian infections to  
146 genus, we compared them to the MalAvi database (Bensch *et al.* 2009).

147

### 148 **Infection across the avian tree**

149 We used 100 trees from BirdTree.org, using the backbone tree from Hackett *et al.* (2008),  
150 that represent the range of possible phylogenetic histories among the 523 bird species in our  
151 study. Details are described in Jetz *et al.* (2012). To visualize patterns of infection across the



## PHYLO-CONSERVATISM OF ECOLOGICAL INTERACTIONS

152 avian tree, we first generated a consensus tree using the `ls.consensus()` function in the R package  
153 *phytools* v. 0.6-00 (Revell 2012). For each host species, we calculated the proportion of birds  
154 infected overall and by each haemosporidian genus. We mapped infection proportions onto the  
155 tree using the `contMap()` function in *phytools*, which estimates the maximum likelihood ancestral  
156 states of continuous traits at internal nodes and interpolates the states along edges based on  
157 Felsenstein (1985). Estimates of prevalence have low accuracy with small sample sizes (Jovani  
158 & Tella 2006), therefore we visualized infection patterns across the phylogeny using species for  
159 which there were at least 10 samples (135 species from 17 families).

160

### 161 **Phylogenetic models with repeated measurements**

162 We used principal component analysis (PCA) to summarize bioclimatic variables across  
163 the 144 unique sample localities. The first two PC axes explained 80.0% of the variation in  
164 temperature and precipitation and were included as predictor variables in models. Loadings  
165 suggested that axis 1 corresponds to increasing temperature across sites, hereafter called  
166 ‘temperature’, and axis 2 corresponds to decreasing precipitation, hereafter called ‘aridity’  
167 (Table S3). Continuous variables (temperature, aridity, elevation, latitude, sampling month, body  
168 mass, and foraging stratum) were standardized to a mean of zero and standard deviation of one.  
169 For traits measured for multiple individuals within species, we accounted for multiple  
170 measurement effects following de Villemereuil & Nakagawa (2014). This approach uses within-  
171 group centering to separate each predictor into two components, one accounting for between-  
172 species variability and the other accounting for within-species variability. We calculated species  
173 means (between-species variability) and subtracted the mean value from individual observations  
174 (within-species differences) and included both components as predictors in models.

PHYLO-CONSERVATISM OF ECOLOGICAL INTERACTIONS

175 We built phylogenetic generalized linear multilevel models using two different Bayesian  
176 statistics packages in R: *MCMCglmm* (Hadfield 2010) and *brms* (Bürkner 2017). The packages  
177 differ in the core Bayesian algorithms they use as well as support for different model types  
178 (reviewed in Mai & Zhang 2018), but both are capable of incorporating phylogenetic information  
179 into multilevel models. We ran models using both packages and compared the outputs.  
180 *MCMCglmm* uses Markov chain Monte Carlo sampling to fit its models, whereas *brms* creates  
181 and fits models in Stan and can easily interface with the R package *loo* (Vehtari *et al.* 2017) to  
182 compute different information criteria. For both packages, we modeled bird infection as a binary  
183 response (0 for uninfected, 1 for infected) separately for each of four different outcomes: the  
184 presence of overall haemosporidian infection, and infection for each of the three genera  
185 (*Haemoproteus*, *Plasmodium*, and *Leucocytozoon*). For each model, predictor variables included  
186 the standardized species mean and within-species predictors for continuous individual-measured  
187 traits, as well as species-level factor predictors. These predictors encompass variation related to  
188 the environment (temperature, aridity, elevation, latitude), season (sampling month), individual  
189 (sex, body mass) or population (relative abundance) characteristics, and life history and behavior  
190 (foraging stratum, sociality, nest type, nest height, uniparental care, cooperative breeding,  
191 plumage dimorphism, lekking, and colonial nesting/roosting).

192 For each response, we compared ten models: 1) an intercept-only null model, 2) an  
193 intercept-only model with both species and phylogenetic random effects, 3) a model with all  
194 predictors and no random effects, 4) a model with all predictors and only a species random  
195 effect, 5) a model with all predictors and only a phylogenetic random effect 6) a model with all  
196 predictors and both phylogenetic and species random effects, 7) a reduced-predictor model with  
197 no random effects, 8) a reduced model with only a species random effect, 9) a reduced model

## PHYLO-CONSERVATISM OF ECOLOGICAL INTERACTIONS

198 with only a phylogenetic random effect, and 10) a reduced model with both phylogenetic and  
199 species random effects. The reduced models included only the predictors found to be important,  
200 i.e., 95% credible intervals (CI) non-overlapping with zero, in the full models. The predictors  
201 retained in the reduced models differed for each response, as reported in Results.

202 In *MCMCglmm*, we used the *MCMCglmm*() function with a “categorical” family and ran  
203 the model across four chains for 200,000 iterations with a burnin period of 100,000, thinned  
204 every 100 steps. We used default priors for the fixed effects, with priors of  $V = 1$ ,  $\nu = 0.02$  for  
205 both residual and random effect variances. In *brms*, we ran models using the *brm*() function with  
206 the “Bernoulli” family and default priors. We ran four chains for 20,000 iterations with a burnin  
207 period of 10,000, thinned every 10 steps, for a total of 4,000 samples. For both packages, we  
208 visually checked for convergence using traceplots and confirmed that Rhat values were less than  
209 1.01. In *brms*, we compared models using the widely applicable information criterion (WAIC,  
210 Watanabe 2010) values as well as approximate leave-one-out cross-validation information  
211 criterion based on the posterior likelihoods (LOOIC, Vehtari *et al.* 2017). We estimated fixed  
212 effects (means and 95% CI) from the posterior distributions for each predictor.

213

### 214 **Phylogenetic signal estimates**

215 Phylogenetic signal, or lambda ( $\lambda$ ), was estimated from the models as the phylogenetic  
216 heritability described by Lynch (1991). Similar to heritability in quantitative genetics,  
217 phylogenetic signal can be estimated as the proportion of the total variance attributed to the  
218 phylogenetic variance. We estimated phylogenetic signal using the full and reduced models for  
219 infection overall and for each haemosporidian genus. We also estimated the proportion of the  
220 total variance attributed to host species, which accounts for unique aspects of the susceptibility

## PHYLO-CONSERVATISM OF ECOLOGICAL INTERACTIONS

221 of species that are not captured by the modeled species traits, or individual or environmental  
222 characteristics. In *MCMCglmm*, the mean and 95% highest posterior density (HPD) of  $\lambda$  were  
223 calculated for each MCMC chain by dividing the phylogenetic variance-covariance (VCV)  
224 matrix by the sum of the phylogenetic, species, and residual VCV matrices (Hadfield &  
225 Nakagawa 2010). In *brms*, phylogenetic signal was computed following the vignette and  
226 recommendations of P. Bürkner ([https://cran.r-](https://cran.r-project.org/web/packages/brms/vignettes/brms_phylogenetics.html)  
227 [project.org/web/packages/brms/vignettes/brms\\_phylogenetics.html](https://cran.r-project.org/web/packages/brms/vignettes/brms_phylogenetics.html)), using the ‘hypothesis’  
228 method and substituting  $\pi^2/3$  for the residual variance.

229 To assess the effect of phylogenetic uncertainty on our models and phylogenetic signal  
230 estimates, we ran the full *brms* models with 100 trees that were randomly selected from the set of  
231 most likely trees. For each tree, we estimated the inverse phylogenetic covariance matrix and ran  
232 the full *brms* model with four chains for 20,000 iterations each, including 10,000 burnin samples,  
233 thinning every 10 samples for a total of 4,000 samples. We calculated mean  $\lambda$  as above from the  
234 posterior distributions of each of the 100 replicate runs to determine the extent of variation in  
235 phylogenetic signal estimated under alternative phylogenetic hypotheses.

236

### 237 **Parasite diversity and infection rate**

238 One additional explanation for variation in susceptibility is variation in parasite diversity;  
239 hosts that can harbor more parasite species have been shown to have higher prevalence (Arriero  
240 & Møller 2008). We tested this additional predictor of infection using the same *brms* model  
241 structure described above. To generate an estimate of parasite diversity independent of sampling  
242 and infection rate, we first pruned the host dataset to include only infected host species with at  
243 least five sequenced infections. We used the `rarefy()` function in the *vegan* 2.5-2 R package to

244 produce a rarefied haplotype diversity index for each host species. This predictor was  
245 standardized as the other continuous variables described above, and included in the *brms* model  
246 with the reduced host species dataset.

247

## 248 **RESULTS**

### 249 **Infection status summary**

250 We detected 1,554 infected birds (39.0%), including 829 birds infected with  
251 *Haemoproteus* (20.8%), 355 with *Plasmodium* (8.9%), and 494 with *Leucocytozoon* (12.4%).  
252 Haemosporidian infection rate varied across the avian phylogeny (Fig. 1b, Fig. 2). Avian  
253 families with the highest infection rates (> 50% of birds infected) included Columbidae and  
254 several oscine Passerine families (Icteridae, Cardinalidae, Emberizidae, Turdidae, and  
255 Thraupidae). In general, we found higher rates of infection in oscines compared to suboscines,  
256 and in certain hummingbird clades (brilliant and coquettes) compared to others (emeralds and  
257 hermits) (Fig. 2; Fig. S1).

258

### 259 **Predictors of haemosporidian infection**

260 Models that included phylogenetic and species random effects fit substantially better than  
261 models with no random effects (Table 1). The reduced-predictor models with both species and  
262 phylogenetic random effects had the lowest WAIC and LOOIC scores for overall infection,  
263 *Haemoproteus*, and *Leucocytozoon*. For *Plasmodium*, the reduced-predictor model with only a  
264 phylogenetic random effect had the lowest scores. We sought to quantify the proportions of  
265 variation attributed to phylogeny and species, respectively, thus we report the results from the  
266 reduced-predictor models including both random effects for all responses.

## PHYLO-CONSERVATISM OF ECOLOGICAL INTERACTIONS

267 Several predictors (foraging stratum, uniparental care, cooperative breeding, plumage  
268 dimorphism, lekking, and sociality) were unimportant for any of the responses (i.e., the 95% CI  
269 overlapped with 0) and were removed to construct the reduced models. Parameter estimates from  
270 *MCMCglmm* and *brms* were highly consistent (Fig. 3, Fig. S2–S5).

271 Aspects of climate, elevation, and latitude were important for overall infection and for  
272 each haemosporidian genus. Overall infection probability increased with increasing temperature,  
273 aridity, elevation, and sampling month (Fig. 3a). Host species that were less abundant (fairly  
274 common or uncommon) tended to be less infected than common species. Different species-level  
275 predictors were considered important for susceptibility to each haemosporidian genus (Fig. 3).

276 *Haemoproteus* infection increased slightly with latitude and sampling month and was  
277 lower for uncommon host species compared to common species (Fig. 3b). Species with open  
278 nests tended to have higher *Haemoproteus* infection compared to species with closed nests.

279 *Plasmodium* infection increased with temperature, aridity, and within-species body mass  
280 (Fig. 3c). Male hosts had higher *Plasmodium* infection compared to females, and species with  
281 lower abundances (fairly common or uncommon) tended to be less infected than common  
282 species.

283 *Leucocytozoon* infection increased with increasing temperature and elevation (Fig. 3d).  
284 *Leucocytozoon* infection was lower for males than females, higher for species with low nests (<3  
285 m) than those with ground nests, and lower for colonial species than non-colonial species.

286

### 287 **Phylogenetic signal in infection**

288 Phylogenetic signal was important for all models; 95% CI of phylogenetic random effects  
289 do not overlap with 0 (Fig 3). The proportions of total variance attributed to phylogeny and

## PHYLO-CONSERVATISM OF ECOLOGICAL INTERACTIONS

290 species, respectively, were consistent between full and reduced models for both *MCMCglmm* and  
291 *brms* (Table 2, Fig. 3). For the reduced *brms* models shown in Fig. 3, phylogenetic signal in  
292 overall infection was 0.17 [95% CI 0.06–0.33]. Phylogenetic signal was lower for *Haemoproteus*  
293 (0.13; [95% CI 0.03–0.28]) and *Leucocytozoon* (0.12; [0.03–0.3]), and highest for *Plasmodium*  
294 (0.35; [0.11–0.61]). For *Haemoproteus* and *Leucocytozoon*, the variance attributed to host  
295 species was larger than the variance attributed to phylogeny (Fig. 3). Our phylogenetic signal  
296 estimates were consistent under alternative, plausible phylogenetic hypotheses, indicating that  
297 the results are robust to phylogenetic uncertainty (Fig. S6). Running the full *brms* model with  
298 100 trees randomly selected from the set of most likely trees produced a mean  $\lambda = 0.24$  (range:  
299 0.18–0.31).

300

### 301 **Parasite diversity and infection rate**

302 Of the 367 infected species, 112 included five or more sequenced infections (mean = 11,  
303 max = 49 infections). Within host species, rarefied haplotype diversity ranged from one to five  
304 (mean = 3.98, stdev = 0.93). Model results indicated that parasite diversity was not an important  
305 predictor of overall infection rate (Fig. S7).

306

### 307 **DISCUSSION**

308 Variation in susceptibility among host species is a common feature of multi-host, multi-  
309 parasite systems, but the importance of phylogeny, while taking other predictors into account,  
310 has rarely been addressed. We found that host phylogeny explains substantial variation in  
311 haemosporidian infection rate, indicating that susceptibility is conserved on the time scale of  
312 avian diversification. Our statistical approach accounted for a suite of life history, behavioral,

PHYLO-CONSERVATISM OF ECOLOGICAL INTERACTIONS

313 temporal, and environmental effects that are demonstrated drivers of infection rate. The results  
314 were consistent between two Bayesian modeling methods and with reduced sets of predictors.  
315 Phylogenetic and species effects were important for all parasite genera, but differed in magnitude  
316 of effect. Phylogenetically conserved susceptibility should affect many aspects of the  
317 evolutionary dynamics of multi-host, multi-parasite systems, including biogeography,  
318 ecoclimatic niches, diversification rates, and host-switching patterns.

319         Phylogenetic conservation of susceptibility was evident at remarkably deep levels within  
320 the avian tree. Most notably, oscine songbirds exhibited substantially higher infection rates than  
321 their sister clade, the suboscines (Fig. 1, Fig. 2). These two clades account for most of the  
322 diversity on the 'bird continent', and are known to differ in fundamental ways, including sound  
323 production mechanisms, song learning, pigmentation, and metabolic rate (Kroodsma 1983;  
324 Swanson & Bozinovic 2011). The current study confirms that they also differ with respect to  
325 susceptibility to haemosporidian parasites, with suboscines being consistently less infected  
326 (Ricklefs 1992, 2002).

327         Some environmental characteristics clearly influence infection rates, while others do not.  
328 For example, overall infection rate tended to increase with increasing temperature and aridity,  
329 and *Leucocytozoon* infection increased substantially at higher elevations. This finding is  
330 consistent with previous studies demonstrating different elevational patterns of infection rate  
331 among haemosporidian genera, possibly caused by elevational variation in vector abundance and  
332 exposure rate (van Rooyen *et al.* 2013; González *et al.* 2014; Harrigan *et al.* 2014).

333         Life history and ecological factors also explain some variation in infection among  
334 species. For example, *Haemoproteus* infection was higher for species with open nests compared  
335 to closed nests, and *Leucocytozoon* infection was higher for species with midstory (<3 m) nest



PHYLO-CONSERVATISM OF ECOLOGICAL INTERACTIONS

336 heights compared to ground nesters. Results from previous studies that have addressed these  
337 factors are mixed (Svensson-Coelho *et al.* 2013; Lutz *et al.* 2015; Fecchio *et al.* 2017a), with  
338 effects typically attributed to vector ecology. Vector feeding preferences for certain host species  
339 affects susceptibility, at least within depauperate communities (Medeiros *et al.* 2015);  
340 nevertheless, compatibility of haemosporidian parasites with host species immune systems  
341 remains an overarching determinant of host susceptibility (Medeiros *et al.* 2013).

342       Phylogenetic variation in susceptibility rises above the variation explained by  
343 environmental and species traits, including a suite of traits that should explain variation in  
344 exposure. This is remarkable for at least two reasons. First, an evolutionarily labile feature such  
345 as an ecological interaction that fluctuates in real time would not be expected to remain  
346 predictable on the basis of distant phylogenetic affinities. Second, several of the environmental  
347 and life history traits that explain some variation in susceptibility are themselves subject to  
348 phylogenetic signal; it is striking that there is additional phylogenetic signal even after these  
349 conserved predictors are included in the model. The conserved evolution of infection status is a  
350 distinct and interesting aspect of phylogenetic niche conservatism (Wiens *et al.* 2010), wherein  
351 ecological interactions are sustained long-term during divergence of related lineages.

352       The causes of deep phylogenetic conservation of susceptibility are most likely molecular  
353 genetic aspects of the innate immune system that are also phylogenetically conserved, with  
354 specificity that is lost gradually over evolutionary time (Schulze-Lefert & Panstruga 2011).  
355 Many innate immune factors are deeply conserved and subject to strong purifying selection  
356 (Malo *et al.* 1994; Hückelhoven *et al.* 2013), but disease resistance can also evolve through  
357 single substitutions in these factors, often accompanied by negative pleiotropy (Aidoo *et al.*  
358 2002; Carter & Nguyen 2011). The latter mechanism could explain the species random effects

PHYLO-CONSERVATISM OF ECOLOGICAL INTERACTIONS

359 demonstrated by our analyses. The basis of species-specificity in malaria parasites can be as  
360 simple as a single, large effect mutation, such as the single change to the CMAH gene in the  
361 ancestor of *Homo sapiens* that became the basis for host specificity in *Plasmodium falciparum*  
362 and related *P. reichenowi* in chimps (Martin *et al.* 2005).

363         The closest precedent for our finding is that of Longdon *et al.* (2011), who found  
364 phylogenetic signal in viral susceptibility among *Drosophila* species that were experimentally  
365 infected with sigma viruses. In that case, susceptibility of host species to each of three sigma  
366 viruses tested was correlated, indicating that it resulted from variation in the generalized immune  
367 response. In our study, infection rates for the three haemosporidian genera within host families  
368 and host species were largely uncorrelated (Fig. S8). This lack of correlation may be a result of  
369 specialized ecoclimatic niches of haemosporidian genera and host lineages, respectively, causing  
370 general susceptibility to manifest differently in different environments. We found that  
371 phylogenetic signal in susceptibility was strongest in *Plasmodium*, the most host-generalized of  
372 the three genera (Valkiunas 2005). Accordingly, we suggest that our results, like those of  
373 Longdon *et al.* (2011), are consistent with variation in the generalized immune response.

374         The success of a parasite depends on the interaction between host resistance traits and  
375 parasite counter-adaptations. Classical defense theory holds that faster growth of the host will  
376 confer lower resistance to parasites (García-Guzmán & Heil 2014). Increased resistance could  
377 thus be explained by slower host-development time, as has been suggested in grass-virus (Cronin  
378 *et al.* 2014), amphibian-trematode (Johnson *et al.* 2012), and bird-haemosporidian systems  
379 (Ricklefs 1992; Ricklefs *et al.* 2018). Variation in host development rate could be a latent  
380 variable that contributed to the phylogenetic signal in susceptibility that we observed.

PHYLO-CONSERVATISM OF ECOLOGICAL INTERACTIONS

381 Abundance of close relatives in a host community may also affect infection rate (Parker  
382 *et al.* 2015; Ellis *et al.* 2017), and could be conserved across our sample of host species. The lack  
383 of a relationship between susceptibility and species diversity of host families in the Peru avifauna  
384 suggests this did not impact our results (Fig. S9). We also included relative abundance in our  
385 models and found that although more abundant species did tend to be more infected, phylogeny  
386 still explained substantial variation in infection status.

387 If conserved host ranges are a general tendency of parasite clades (Gilbert & Webb 2007;  
388 Davies & Pedersen 2008; de Vienne *et al.* 2009; Russell *et al.* 2009; Longdon *et al.* 2011), it  
389 could cause related host species to harbor similar parasite communities. Such a process could  
390 plausibly lead to phylogenetic signal in infection rates in two ways. First, if certain host clades  
391 diversified more rapidly, species within those clades may receive host switches at higher  
392 frequency and exhibit higher susceptibility. Indeed, Engelstädter & Fortuna (2018) predicted  
393 higher infection rates in faster diversifying clades as a consequence of host-shifts tending to be  
394 among close relatives. We found no clear evidence of this pattern in our data; host family-level  
395 diversity, whether global or regional, was not linked to infection rate (Fig. S9). Secondly, the  
396 phylogenetic host-range effect could result in a conserved pattern of susceptibility if particular  
397 host clades have more compatible parasites than others. In this case, one prediction is that host  
398 species within clades that have higher parasite diversity would have higher susceptibility. In this  
399 study, we found no evidence for an effect of parasite diversity on infection rate (Fig. S7).  
400 Furthermore, for avian haemosporidians, the community of parasite lineages in any given host  
401 species or family tends to be drawn from across the haemosporidian phylogeny (see Fig. 1b), and  
402 generalist parasites with eclectic host ranges are frequent (Hellgren *et al.* 2009; Loiseau *et al.*

PHYLO-CONSERVATISM OF ECOLOGICAL INTERACTIONS

403 2012; Svensson-Coelho *et al.* 2013). This suggests that phylogenetic signal in susceptibility is  
404 not explained by conserved host ranges in this system.

405 Phylogenetic conservatism of species interactions could have implications for  
406 evolutionary fates and net diversification rates of clades. The results of this study underscore  
407 how deep evolutionary history is relevant to real-time ecological outcomes, suggesting there are  
408 constraints on immune system innovations that affect long-term shifts in susceptibility. However,  
409 the implications for diversification are not simple; we found no link between infection rate and  
410 host-clade size at the family level (Fig. S9). Phylogenetic variation in susceptibility implies that  
411 changes in disease pressure are likely to affect the phylogenetic structure of communities (and  
412 vice versa) and could potentially maintain phylogenetic alpha- and beta-diversity (Barrett *et al.*  
413 2009). Alpha-diversity could be enhanced via Janzen–Connell type dynamics (Terborgh 2012;  
414 Gilbert & Parker 2016), in which density of conspecific or related hosts is regulated by shared  
415 susceptibility to a parasite. Beta-diversity (and alpha-diversity) could be enhanced by 'apparent  
416 competition' (Holt 1977; Ricklefs 2010), in which species are differentially susceptible to a  
417 shared generalist parasite. The fact that some variation in susceptibility is conserved on a scale of  
418 tens of millions of years suggests that these same ecological mechanisms maintain deep  
419 phylogenetic diversity of hosts, a long-celebrated characteristic of the South American avifauna.

420

421 **ACKNOWLEDGEMENTS**

422 We thank John M. Bates, Shannon Hackett, Emil Bautista, Shane G. DuBay, Ariel M.  
423 Gaffney, C. Jonathan Schmitt, Andrew B. Johnson, Laura Pages Barcelo, and Ben Winger. This  
424 work was supported in part by NSF DEB-1146491, NSF DEB-1503804, NSF PRFB-1611710, a

PHYLO-CONSERVATISM OF ECOLOGICAL INTERACTIONS

- 425 CETI seed grant (NCRR-NIH P20RR018754), the Davee Foundation, the Faulk Medical  
426 Research Trust, and the Pritzker DNA Laboratory.

427 **REFERENCES**

- 428 Aidoo, M., Terlouw, D.J., Kolczak, M.S., McElroy, P.D., ter Kuile, F.O., Kariuki, S., *et al.*  
429 (2002). Protective effects of the sickle cell gene against malaria morbidity and mortality.  
430 *Lancet*, 359, 1311–1312.
- 431 Anderson, R.C. (2000). *Nematode Parasites of Vertebrates. Their Development and*  
432 *Transmission. 2nd Edition.* CABI Publishing, Wallingford, Oxon, UK.
- 433 Arriero, E. & Møller, A.P. (2008). Host ecology and life-history traits associated with blood  
434 parasite species richness in birds. *J. Evol. Biol.*, 21, 1504–1513.
- 435 Atkinson, C.T., Saili, K.S., Utzurrum, R.B. & Jarvi, S.I. (2013). Experimental evidence for  
436 evolved tolerance to avian malaria in a wild population of low elevation Hawai'i 'Amakihi  
437 (*Hemignathus virens*). *Ecohealth*, 10, 366–375.
- 438 Barrett, L.G., Kniskern, J.M., Bodenhausen, N., Zhang, W. & Bergelson, J. (2009). Continua of  
439 specificity and virulence in plant host-pathogen interactions: Causes and consequences.  
440 *New Phytol.*, 183, 513–529.
- 441 Barrett, L.G., Zee, P.C., Bever, J.D., Miller, J.T. & Thrall, P.H. (2016). Evolutionary history  
442 shapes patterns of mutualistic benefit in Acacia-rhizobial interactions. *Evolution*, 70, 1473–  
443 1485.
- 444 Beadell, J.S., Covas, R., Gebhard, C., Ishtiaq, F., Melo, M., Schmidt, B.K., *et al.* (2009). Host  
445 associations and evolutionary relationships of avian blood parasites from West Africa. *Int.*  
446 *J. Parasitol.*, 39, 257–266.
- 447 Bennett, G.F. & Cameron, M. (1974). Seasonal prevalence of avian hematozoa in passeriform  
448 birds of Atlantic Canada. *Can. J. Zool.*, 52, 1259–1264.
- 449 Bensch, S., Hellgren, O. & Pérez-Tris, J. (2009). MalAvi: a public database of malaria parasites

PHYLO-CONSERVATISM OF ECOLOGICAL INTERACTIONS

- 450 and related haemosporidians in avian hosts based on mitochondrial cytochrome b lineages.  
451 *Mol. Ecol. Resour.*, 9, 1353–1358.
- 452 Blomberg, S.P., Garland, T. & Ives, A.R. (2003). Testing for phylogenetic signal in comparative  
453 data: Behavioral traits are more labile. *Evolution*, 57, 717.
- 454 Bradley, D.J., Gilbert, G.S. & Martiny, J.B.H. (2008). Pathogens promote plant diversity through  
455 a compensatory response. *Ecol. Lett.*, 11, 461–469.
- 456 Bürkner, P.-C. (2017). brms: An R Package for Bayesian Multilevel Models Using Stan. *J. Stat.*  
457 *Softw.*, 80, 1–28.
- 458 Carter, A.J. & Nguyen, A.Q. (2011). Antagonistic pleiotropy as a widespread mechanism for the  
459 maintenance of polymorphic disease alleles. *BMC Med. Genet.*, 12, 160.
- 460 Charleston, M.A. & Robertson, D.L. (2002). Preferential host switching by primate lentiviruses  
461 can account for phylogenetic similarity with the primate phylogeny. *Syst. Biol.*, 51, 528–  
462 535.
- 463 Clark, N.J. & Clegg, S.M. (2017). Integrating phylogenetic and ecological distances reveals new  
464 insights into parasite host specificity. *Mol. Ecol.*, 26, 3074–3086.
- 465 Cronin, J.P., Rúa, M.A. & Mitchell, C.E. (2014). Why is living fast dangerous? Disentangling  
466 the roles of resistance and tolerance of disease. *Am. Nat.*, 184, 172–187.
- 467 Davies, T.J. & Pedersen, A.B. (2008). Phylogeny and geography predict pathogen community  
468 similarity in wild primates and humans. *Proc. R. Soc. B Biol. Sci.*, 275, 1695–1701.
- 469 Decaestecker, E., Gaba, S., Raeymaekers, J.A.M., Stoks, R., Van Kerckhoven, L., Ebert, D., *et*  
470 *al.* (2007). Host-parasite “Red Queen” dynamics archived in pond sediment. *Nature*, 450,  
471 870–873.
- 472 Doña, J., Proctor, H., Mironov, S., Serrano, D. & Jovani, R. (2018). Host specificity, infrequent

PHYLO-CONSERVATISM OF ECOLOGICAL INTERACTIONS

- 473 major host switching and the diversification of highly host-specific symbionts: The case of  
474 vane-dwelling feather mites. *Glob. Ecol. Biogeogr.*, 27, 188–198.
- 475 Ellis, V.A., Medeiros, M.C.I., Collins, M.D., Sari, E.H.R., Coffey, E.D., Dickerson, R.C., *et al.*  
476 (2017). Prevalence of avian haemosporidian parasites is positively related to the abundance  
477 of host species at multiple sites within a region. *Parasitol. Res.*, 116, 73–80.
- 478 Ellison, A.R., Tunstall, T., Direnzo, G. V., Hughey, M.C., Rebollar, E.A., Belden, L.K., *et al.*  
479 (2015). More than skin deep: Functional genomic basis for resistance to amphibian  
480 chytridiomycosis. *Genome Biol. Evol.*, 7, 286–298.
- 481 Engelstädter, J. & Fortuna, N.Z. (2018). The dynamics of preferential host switching: host  
482 phylogeny as a key predictor of parasite prevalence and distribution. *bioRxiv*, 209254.
- 483 Fallon, S.M., Bermingham, E. & Ricklefs, R.E. (2003). Island and taxon effects in parasitism  
484 revisited: Avian malaria in the Lesser Antilles. *Evolution*, 57, 606–615.
- 485 Fallon, S.M., Bermingham, E. & Ricklefs, R.E. (2005). Host specialization and geographic  
486 localization of avian malaria parasites: A regional analysis in the Lesser Antilles. *Am. Nat.*,  
487 165, 466–480.
- 488 Fallon, S.M., Ricklefs, R.E., Latta, S.C. & Bermingham, E. (2004). Temporal stability of insular  
489 avian malarial parasite communities. *Proc. R. Soc. B Biol. Sci.*, 271, 493–500.
- 490 Fecchio, A., Bell, J.A., Collins, M.D., Farias, I.P., Trisos, C.H., Tobias, J.A., *et al.* (2018).  
491 Diversification by host switching and dispersal shaped the diversity and distribution of  
492 avian malaria parasites in Amazonia. *Oikos*, 127, 1233–1242.
- 493 Fecchio, A., Ellis, V.A., Bell, J.A., Andretti, C.B., D’Horta, F.M., Silva, A.M., *et al.* (2017a).  
494 Avian malaria, ecological host traits and mosquito abundance in southeastern Amazonia.  
495 *Parasitology*, 144, 1117–1132.



PHYLO-CONSERVATISM OF ECOLOGICAL INTERACTIONS

- 496 Fecchio, A., Pinheiro, R., Felix, G., Faria, I.P., Pinho, J.B., Lacorte, G.A., *et al.* (2017b). Host  
497 community similarity and geography shape the diversity and distribution of haemosporidian  
498 parasites in Amazonian birds. *Ecography*, 41, 505–515.
- 499 Felsenstein, J. (1985). Phylogenies and the comparative method. *Am. Nat.*, 125, 1–15.
- 500 Galen, S.C., Borner, J., Martinsen, E.S., Schaer, J., Austin, C.C., West, C.J., *et al.* (2018). The  
501 polyphyly of *Plasmodium*: comprehensive phylogenetic analyses of the malaria parasites  
502 (order Haemosporida) reveal widespread taxonomic conflict. *R. Soc. Open Sci.*, 5, 171780.
- 503 Galen, S.C. & Witt, C.C. (2014). Diverse avian malaria and other haemosporidian parasites in  
504 Andean house wrens: Evidence for regional co-diversification by host-switching. *J. Avian  
505 Biol.*, 45, 374–386.
- 506 Garamszegi, L.Z. & Møller, A.P. (2012). The interspecific relationship between prevalence of  
507 blood parasites and sexual traits in birds when considering recent methodological  
508 advancements. *Behav. Ecol. Sociobiol.*, 66, 107–119.
- 509 García-Guzmán, G. & Heil, M. (2014). Life histories of hosts and pathogens predict patterns in  
510 tropical fungal plant diseases. *New Phytol.*, 201, 1106–1120.
- 511 Garvin, M.C. & Remsen, J.V. (1997). An alternative hypothesis for heavier parasite loads of  
512 brightly colored birds: Exposure at the nest. *Auk*, 114, 179–191.
- 513 Gaunt, R.E. (1995). The relationship between plant disease severity and yield. *Annu. Rev.  
514 Phytopathol.*, 33, 119–144.
- 515 Gilbert, G.S., Briggs, H.M. & Magarey, R. (2015). The impact of plant enemies shows a  
516 phylogenetic signal. *PLoS One*, 10, e0123758.
- 517 Gilbert, G.S., Magarey, R., Suiter, K. & Webb, C.O. (2012). Evolutionary tools for phytosanitary  
518 risk analysis: Phylogenetic signal as a predictor of host range of plant pests and pathogens.

PHYLO-CONSERVATISM OF ECOLOGICAL INTERACTIONS

- 519 *Evol. Appl.*, 5, 869–878.
- 520 Gilbert, G.S. & Parker, I.M. (2016). The evolutionary ecology of plant disease: A phylogenetic  
521 perspective. *Annu. Rev. Phytopathol.*, 54, 549–578.
- 522 Gilbert, G.S. & Webb, C.O. (2007). Phylogenetic signal in plant pathogen-host range. *Proc.*  
523 *Natl. Acad. Sci.*, 104, 4979–4983.
- 524 González, A.D., Matta, N.E., Ellis, V.A., Miller, E.T., Ricklefs, R.E. & Gutiérrez, H.R. (2014).  
525 Mixed species flock, nest height, and elevation partially explain avian haemoparasite  
526 prevalence in Colombia. *PLoS One*, 9, e100695.
- 527 Hackett, S.J., Kimball, R.T., Reddy, S., Bowie, R.C.K., Braun, E.L., Braun, M.J., *et al.* (2008). A  
528 phylogenomic study of birds reveals their evolutionary history. *Science*, 320, 1763–8.
- 529 Hadfield, J.D. (2010). MCMC methods for multi-response generalized linear mixed models: the  
530 MCMCglmm R package. *J. Stat. Softw.*, 33, 1–22.
- 531 Hadfield, J.D. & Nakagawa, S. (2010). General quantitative genetic methods for comparative  
532 biology: Phylogenies, taxonomies and multi-trait models for continuous and categorical  
533 characters. *J. Evol. Biol.*, 23, 494–508.
- 534 Harrigan, R.J., Sedano, R., Chasar, A.C., Chaves, J.A., Nguyen, J.T., Whitaker, A., *et al.* (2014).  
535 New host and lineage diversity of avian haemosporidia in the northern andes. *Evol. Appl.*, 7,  
536 799–811.
- 537 Hatcher, M.J., Dick, J.T.A. & Dunn, A.M. (2006). How parasites affect interactions between  
538 competitors and predators. *Ecol. Lett.*, 9, 1253–1271.
- 539 Hellgren, O., Pérez-Tris, J. & Bensch, S. (2009). A jack-of-all-trades and still a master of some:  
540 Prevalence and host range in avian malaria and related blood parasites. *Ecology*, 90, 2840–  
541 2849.

PHYLO-CONSERVATISM OF ECOLOGICAL INTERACTIONS

- 542 Hellgren, O., Waldenström, J. & Bensch, S. (2004). A new PCR assay for simultaneous studies  
543 of *Leucocytozoon*, *Plasmodium*, and *Haemoproteus* from avian blood. *J. Parasitol.*, 90,  
544 797–802.
- 545 Hijmans, R.J. (2016). raster: Geographic Data Analysis and Modeling. R package version 2.5-8.  
546 <https://CRAN.R-project.org/package=raster>.
- 547 Hijmans, R.J., Cameron, S.E., Parra, J.L., Jones, P.G. & Jarvis, A. (2005). Very high resolution  
548 interpolated climate surfaces for global land areas. *Int. J. Climatol.*, 25, 1965–1978.
- 549 Holt, R.D. (1977). Predation, apparent competition, and the structure of prey communities.  
550 *Theor. Popul. Biol.*, 12, 197–229.
- 551 Holt, R.D. & Bonsall, M.B. (2017). Apparent competition. *Annu. Rev. Ecol. Evol. Syst.*, 48, 447–  
552 471.
- 553 del Hoyo, J., Elliott, A., Sargatal, J., Christie, D.A. & de Juana, E. (2018). *Handbook of the Birds*  
554 *of the World Alive*. Lynx Edicions, Barcelona. Available at: <http://www.hbw.com/>. Last  
555 accessed 12 February 2018.
- 556 Hückelhoven, R., Eichmann, R., Weis, C., Hoefle, C. & Proels, R.K. (2013). Genetic loss of  
557 susceptibility: A costly route to disease resistance? *Plant Pathol.*, 62, 56–62.
- 558 Jetz, W., Thomas, G.H., Joy, J.B., Hartmann, K. & Mooers, A.O. (2012). The global diversity of  
559 birds in space and time. *Nature*, 491, 444–448.
- 560 Johnson, P.T.J., Rohr, J.R., Hoverman, J.T., Kellermanns, E., Bowerman, J. & Lunde, K.B.  
561 (2012). Living fast and dying of infection: Host life history drives interspecific variation in  
562 infection and disease risk. *Ecol. Lett.*, 15, 235–242.
- 563 Jovani, R. & Tella, J.L. (2006). Parasite prevalence and sample size: misconceptions and  
564 solutions. *Trends Parasitol.*, 22, 214–218.

PHYLO-CONSERVATISM OF ECOLOGICAL INTERACTIONS

- 565 Kroodsma, D.E. (1983). The ecology of avian vocal learning. *Bioscience*, 33, 165–171.
- 566 Loiseau, C., Harrigan, R.J., Robert, A., Bowie, R.C.K., Thomassen, H.A., Smith, T.B., *et al.*  
567 (2012). Host and habitat specialization of avian malaria in Africa. *Mol. Ecol.*, 21, 431–441.
- 568 Longdon, B., Hadfield, J.D., Webster, C.L., Obbard, D.J. & Jiggins, F.M. (2011). Host  
569 phylogeny determines viral persistence and replication in novel hosts. *PLoS Pathog.*, 7,  
570 e1002260.
- 571 Lutz, H.L., Hochachka, W.M., Engel, J.I., Bell, J.A., Tkach, V. V., Bates, J.M., *et al.* (2015).  
572 Parasite prevalence corresponds to host life history in a diverse assemblage of afrotropical  
573 birds and haemosporidian parasites. *PLoS One*, 10, e0121254.
- 574 Lynch, M. (1991). Methods for the analysis of comparative data in evolutionary biology.  
575 *Evolution*, 45, 1065–1080.
- 576 Mai, Y. & Zhang, Z. (2018). Software packages for Bayesian multilevel modeling. *Struct. Equ.*  
577 *Model.*, 25, 650–658.
- 578 Malo, D., Vogan, K., Vidal, S., Hu, J., Cellier, M., Schurr, E., *et al.* (1994). Haplotype mapping  
579 and sequence analysis of the mouse Nramp gene predict susceptibility to infection with  
580 intracellular parasites. *Genomics*, 23, 51–61.
- 581 Martin, M.J., Rayner, J.C., Gagneux, P., Barnwell, J.W. & Varki, A. (2005). Evolution of  
582 human-chimpanzee differences in malaria susceptibility: Relationship to human genetic loss  
583 of N-glycolylneuraminic acid. *Proc. Natl. Acad. Sci.*, 102, 12819–12824.
- 584 Masello, J.F., Martínez, J., Calderón, L., Wink, M., Quillfeldt, P., Sanz, V., *et al.* (2018). Can the  
585 intake of antiparasitic secondary metabolites explain the low prevalence of hemoparasites  
586 among wild Psittaciformes? *Parasites and Vectors*, 11, 357.
- 587 Medeiros, M.C.I., Hamer, G.L. & Ricklefs, R.E. (2013). Host compatibility rather than vector –

PHYLO-CONSERVATISM OF ECOLOGICAL INTERACTIONS

- 588 host-encounter rate determines the host range of avian *Plasmodium* parasites. *Proc. R. Soc.*  
589 *B Biol. Sci.*, 280, 20122947.
- 590 Medeiros, M.C.I., Ricklefs, R.E., Brawn, J.D. & Hamer, G.L. (2015). *Plasmodium* prevalence  
591 across avian host species is positively associated with exposure to mosquito vectors.  
592 *Parasitology*, 142, 1612–1620.
- 593 Merilä, J., Björklund, M. & Bennett, G.F. (1995). Geographic and individual variation in  
594 haematozoan infections in the greenfinch, *Carduelis chloris*. *Can. J. Zool.*, 73, 1798–1804.
- 595 Parker, I.M., Saunders, M., Bontrager, M., Weitz, A.P., Hendricks, R., Magarey, R., *et al.*  
596 (2015). Phylogenetic structure and host abundance drive disease pressure in communities.  
597 *Nature*, 520, 542–544.
- 598 Parker, T.A.I., Stotz, D.F. & Fitzpatrick, J.W. (1996). Ecological and distributional databases.  
599 Supplement to Neotropical birds: ecology and conservation. In: *Neotropical birds: ecology*  
600 *and conservation* (eds. Stotz, D.F., Fitzpatrick, J.W., Parker, T.A.I. & Moskovits, D.K.).  
601 University of Chicago Press, Chicago.
- 602 Power, A.G. & Mitchell, C.E. (2004). Pathogen spillover in disease epidemics. *Am. Nat.*, 164,  
603 S79–S89.
- 604 Pulgarín-R, P.C., Gómez, J.P., Robinson, S., Ricklefs, R.E. & Cadena, C.D. (2018). Host  
605 species, and not environment, predicts variation in blood parasite prevalence, distribution,  
606 and diversity along a humidity gradient in northern South America. *Ecol. Evol.*, 8, 3800–  
607 3814.
- 608 Revell, L.J. (2012). phytools: an R package for phylogenetic comparative biology (and other  
609 things). *Methods Ecol. Evol.*, 3, 217–223.
- 610 Ricklefs, R.E. (1992). Embryonic development period and the prevalence of avian blood

PHYLO-CONSERVATISM OF ECOLOGICAL INTERACTIONS

- 611 parasites. *Proc. Natl. Acad. Sci.*, 89, 4722–4725.
- 612 Ricklefs, R.E. (2002). Splendid isolation: Historical ecology of the South American passerine  
613 fauna. *J. Avian Biol.*, 33, 207–211.
- 614 Ricklefs, R.E. (2010). Host-pathogen coevolution, secondary sympatry and species  
615 diversification. *Philos. Trans. R. Soc. Lond. B. Biol. Sci.*, 365, 1139–47.
- 616 Ricklefs, R.E., Dodge Gray, J., Latta, S.C. & Svensson-Coelho, M. (2011). Distribution  
617 anomalies in avian haemosporidian parasites in the southern Lesser Antilles. *J. Avian Biol.*,  
618 42, 570–584.
- 619 Ricklefs, R.E., Ellis, V.A., Medeiros, M.C. & Svensson-Coelho, M. (2018). Duration of embryo  
620 development and the prevalence of haematozoan blood parasites in birds. *Auk*, 135, 276–  
621 283.
- 622 Ricklefs, R.E., Fallon, S.M. & Bermingham, E. (2004). Evolutionary relationships, cospeciation,  
623 and host switching in avian malaria parasites. *Syst. Biol.*, 53, 111–119.
- 624 Ricklefs, R.E., Outlaw, D.C., Svensson-Coelho, M., Medeiros, M.C.I., Ellis, V.A. & Latta, S.  
625 (2014). Species formation by host shifting in avian malaria parasites. *Proc. Natl. Acad. Sci.*  
626 *U. S. A.*, 111, 14816–21.
- 627 van Riper, C., van Riper, S.G., Goff, M.L. & Laird, M. (1986). The epizootiology and ecological  
628 significance of malaria in Hawaiian land birds. *Ecol. Monogr.*, 56, 327–344.
- 629 van Rooyen, J., Lalubin, F., Glaizot, O., Christe, P., Rooyen, J. van, Lalubin, F., *et al.* (2013).  
630 Altitudinal variation in haemosporidian parasite distribution in great tit populations.  
631 *Parasites and Vectors*, 6, 139.
- 632 Russell, J.A., Goldman-Huertas, B., Moreau, C.S., Baldo, L., Stahlhut, J.K., Werren, J.H., *et al.*  
633 (2009). Specialization and geographic isolation among *Wolbachia* symbionts from ants and

PHYLO-CONSERVATISM OF ECOLOGICAL INTERACTIONS

- 634 lycaenid butterflies. *Evolution*, 63, 624–640.
- 635 Savage, A.E., Sredl, M.J. & Zamudio, K.R. (2011). Disease dynamics vary spatially and  
636 temporally in a North American amphibian. *Biol. Conserv.*, 144, 1910–1915.
- 637 Scheuerlein, A. & Ricklefs, R.E. (2004). Prevalence of blood parasites in European passeriform  
638 birds. *Proc. R. Soc. B Biol. Sci.*, 271, 1363–1370.
- 639 Schreeg, L.A., Kress, W.J., Erickson, D.L. & Swenson, N.G. (2010). Phylogenetic analysis of  
640 local-scale tree soil associations in a lowland moist tropical forest. *PLoS One*, 5, e13685.
- 641 Schulze-Lefert, P. & Panstruga, R. (2011). A molecular evolutionary concept connecting nonhost  
642 resistance, pathogen host range, and pathogen speciation. *Trends Plant Sci.*, 16, 117–125.
- 643 Searle, C.L., Gervasi, S.S., Hua, J., Hammond, J.I., Relyea, R.A., Olson, D.H., *et al.* (2011).  
644 Differential host susceptibility to *Batrachochytrium dendrobatidis*, an emerging amphibian  
645 pathogen. *Conserv. Biol.*, 25, 965–974.
- 646 Soares, L., Latta, S.C. & Ricklefs, R.E. (2017). Dynamics of avian haemosporidian assemblages  
647 through millennial time scales inferred from insular biotas of the West Indies. *Proc. Natl.*  
648 *Acad. Sci.*, 114, 6635–6640.
- 649 Streicker, D.G., Turmelle, A.S., Vonhof, M.J., Kuzmin, I. V, McCracken, G.F. & Rupprecht,  
650 C.E. (2010). Host phylogeny constrains cross-species emergence and establishment of  
651 rabies virus in bats. *Science*, 329, 676–679.
- 652 Suh, A., Witt, C.C., Menger, J., Sadanandan, K.R., Podsiadlowski, L., Gerth, M., *et al.* (2016).  
653 Ancient horizontal transfers of retrotransposons between birds and ancestors of human  
654 pathogenic nematodes. *Nat. Commun.*, 7, 11396.
- 655 Svensson-Coelho, M., Blake, J.G., Loiselle, B.A., Penrose, A.S., Parker, P.G. & Ricklefs, R.E.  
656 (2013). Diversity, prevalence, and host specificity of avian *Plasmodium* and *Haemoproteus*

PHYLO-CONSERVATISM OF ECOLOGICAL INTERACTIONS

- 657 in a Western Amazon assemblage. *Ornithol. Monogr.*, 76, 1–47.
- 658 Swanson, D.L. & Bozinovic, F. (2011). Metabolic capacity and the evolution of biogeographic  
659 patterns in oscine and suboscine passerine birds. *Physiol. Biochem. Zool.*, 84, 185–194.
- 660 Terborgh, J. (2012). Enemies maintain hyperdiverse tropical forests. *Am. Nat.*, 179, 303–314.
- 661 Tinsley, M.C. & Majerus, M.E.N. (2007). Small steps or giant leaps for male-killers?  
662 Phylogenetic constraints to male-killer host shifts. *BMC Evol. Biol.*, 7, 238.
- 663 Valkiunas, G. (2005). *Avian malaria parasites and other haemosporidia*. CRC Press, Boca  
664 Raton, Florida, USA.
- 665 Vehtari, A., Gelman, A. & Gabry, J. (2017). Practical Bayesian model evaluation using leave-  
666 one-out cross-validation and WAIC. *Stat. Comput.*, 27, 1413–1432.
- 667 de Vienne, D.M., Hood, M.E. & Giraud, T. (2009). Phylogenetic determinants of potential host  
668 shifts in fungal pathogens. *J. Evol. Biol.*, 22, 2532–2541.
- 669 de Villemereuil, P. & Nakagawa, S. (2014). General quantitative genetic methods for  
670 comparative biology. In: *Modern phylogenetic comparative methods and their application*  
671 *in evolutionary biology* (ed. Garamszegi, L.Z.). Springer Berlin Heidelberg, pp. 287–303.
- 672 Waldenström, J., Bensch, S., Hasselquist, D. & Östman, Ö. (2004). A new nested polymerase  
673 chain reaction method very efficient in detecting *Plasmodium* and *Haemoproteus* infections  
674 from avian blood. *J. Parasitol.*, 90, 191–194.
- 675 Walther, B.A., Clayton, D.H. & Gregory, R.D. (1999). Showiness of Neotropical birds in  
676 relation to ectoparasite abundance and foraging stratum. *Oikos*, 87, 157–165.
- 677 Watanabe, S. (2010). Asymptotic equivalence of Bayes cross validation and widely applicable  
678 information criterion in singular learning theory. *J. Mach. Learn. Res.*, 11, 3571–3594.
- 679 Waxman, D., Weinert, L.A. & Welch, J.J. (2014). Inferring host range dynamics from



PHYLO-CONSERVATISM OF ECOLOGICAL INTERACTIONS

- 680 comparative data: The protozoan parasites of New World monkeys. *Am. Nat.*, 184, 65–74.
- 681 Wiens, J.J., Ackerly, D.D., Allen, A.P., Anacker, B.L., Buckley, L.B., Cornell, H. V., *et al.*
- 682 (2010). Niche conservatism as an emerging principle in ecology and conservation biology.
- 683 *Ecol. Lett.*, 13, 1310–1324.
- 684 Woodworth, B.L., Atkinson, C.T., LaPointe, D.A., Hart, P.J., Spiegel, C.S., Tweed, E.J., *et al.*
- 685 (2005). Host population persistence in the face of introduced vector-borne diseases: Hawaii
- 686 amakihi and avian malaria. *Proc. Natl. Acad. Sci.*, 102, 1531–1536.
- 687 Zhang, C., Yang, J., Sha, L., Ci, X., Li, J., Cao, M., *et al.* (2017). Lack of phylogenetic signals
- 688 within environmental niches of tropical tree species across life stages. *Sci. Rep.*, 7, 42007.
- 689

PHYLO-CONSERVATISM OF ECOLOGICAL INTERACTIONS

**Table 1** Comparison of *brms* models with species, phylogenetic (phylo), both, or no random effects. Model fit was assessed using the widely applicable information criterion (WAIC) and leave one out cross-validation (LOOIC). WAIC results were consistent with LOOIC. The difference between each model and the best fit model (lowest LOOIC) is shown as  $\Delta$ LOOIC with the standard error (SE). Reduced models include the set of predictors that were considered important in the full models (95% CI non-overlapping with 0) for each response, i.e., a different set of predictors is included in each of the reduced models. For all responses, models including species and phylogenetic random effects fit substantially better than models without random effects.

| Model Description |     |         |                |       | Response            |                     |                     |                      |
|-------------------|-----|---------|----------------|-------|---------------------|---------------------|---------------------|----------------------|
| Predictors        |     |         | Random Effects |       | Overall Infected    | <i>Haemoproteus</i> | <i>Plasmodium</i>   | <i>Leucocytozoon</i> |
| None              | All | Reduced | Species        | Phylo | $\Delta$ LOOIC (SE) | $\Delta$ LOOIC (SE) | $\Delta$ LOOIC (SE) | $\Delta$ LOOIC (SE)  |
| X                 |     |         |                |       | 521.3 (45.3)        | 507.9 (46.4)        | 252.2 (34.6)        | 454.3 (41.3)         |
|                   |     | X       |                |       | 434.8 (41.1)        | 374.5 (38.4)        | 168.4 (27.5)        | 240.5 (31.7)         |
|                   | X   |         |                |       | 335.3 (37)          | 309.1 (37)          | 155.4 (26.1)        | 170.6 (29.8)         |
|                   |     | X       | X              |       | 36.1 (12.1)         | 10.3 (7.1)          | 19.5 (13.7)         | 7.8 (7.2)            |
|                   | X   |         | X              |       | 33.5 (12.3)         | 8.9 (10.9)          | 33.2 (14.6)         | 6.9 (12.3)           |
| X                 |     |         | X              | X     | 22 (12.6)           | 14.3 (10.1)         | 28.6 (14.2)         | 89.9 (18.6)          |
|                   | X   |         |                | X     | 22 (12.7)           | 32.5 (15.2)         | 13 (8.8)            | 24.3 (15.1)          |
|                   |     | X       |                | X     | 15.2 (10.2)         | 32.4 (11.7)         | <b>0</b>            | 20.3 (9.7)           |
|                   | X   |         | X              | X     | 10.2 (7.7)          | 6.4 (9.6)           | 18.4 (9.7)          | 2.9 (11.3)           |
|                   |     | X       | X              | X     | <b>0</b>            | <b>0</b>            | 2.5 (4.9)           | <b>0</b>             |

PHYLO-CONSERVATISM OF ECOLOGICAL INTERACTIONS

**Table 2** Phylogenetic signal estimates from *brms* and *MCMCglmm* full and reduced models.

Means and 95% credible intervals for phylogenetic signal, or lambda ( $\lambda$ ), estimated from *brms* and *MCMCglmm* for full and reduced models.  $\lambda$  is the proportion of total variance attributed to phylogenetic variance.

| Response             | <i>brms</i>      |                  | <i>MCMCglmm</i>  |                  |
|----------------------|------------------|------------------|------------------|------------------|
|                      | Full             | Reduced          | Full             | Reduced          |
| Overall Infected     | 0.20 (0.07–0.38) | 0.17 (0.06–0.33) | 0.20 (0.06–0.35) | 0.17 (0.04–0.30) |
| <i>Haemoproteus</i>  | 0.13 (0.02–0.32) | 0.13 (0.03–0.28) | 0.09 (0.00–0.23) | 0.11 (0.02–0.24) |
| <i>Plasmodium</i>    | 0.36 (0.11–0.63) | 0.35 (0.11–0.61) | 0.36 (0.09–0.60) | 0.36 (0.08–0.61) |
| <i>Leucocytozoon</i> | 0.13 (0.03–0.32) | 0.12 (0.03–0.30) | 0.10 (0.01–0.22) | 0.08 (0.00–0.19) |

## Figure Captions

Fig. 1 Summary of avian haemosporidian infection across Andean bird families. (a) Distribution of sample localities in Peru. Elevation is from the SRTM database with 90 m resolution, using the *raster* R package (Hijmans 2016). (b) Combined prevalence for *Haemoproteus* (including *Parahaemoproteus*; blue), *Plasmodium* (yellow), and *Leucocytozoon* (green) across well-sampled ( $\geq 15$  individuals) bird families. Bar plots depicting the proportion of birds infected by each haemosporidian genus are stacked. Sample sizes are shown adjacent to bars. The tree is a least-squares consensus of 100 phylogeny subsets from BirdTree.org.

Fig. 2 Haemosporidian infection across the avian phylogeny. The proportion of individuals infected for each well-sampled host species ( $\geq 10$  individuals) was mapped as a continuous trait using the `contMap()` function in *phytools* (Revell 2012). The tree is a least-squares consensus of 100 phylogeny subsets from BirdTree.org.

Fig. 3 Posterior mean estimates and 95% credible intervals of predictors and random effects on infection status for reduced *brms* models. Parameters with intervals that do not overlap zero are considered to have a significant influence on the response. Intercepts were removed for visualization and are shown in Fig. S4. For continuous variables, both among-species and within-species effects are shown. For categorical variables, the effects shown are relative to the reference categories: Sex (*female*), Nest type (*closed*), Abundance (*common*), Nest height (*ground*), and Colonial (*no*). F = Fairly common, U = Uncommon/rare, H = high, L = low. Panels to the right depict the proportion of total variance attributed to species (grey) or

## PHYLO-CONSERVATISM OF ECOLOGICAL INTERACTIONS

phylogeny (blue). Results are consistent across full and reduced models for both *MCMCglmm* and *brms*. The proportion of variance attributed to phylogeny is the phylogenetic signal, which was significant for all models based on the ‘hypothesis’ test in *brms*.

(a)

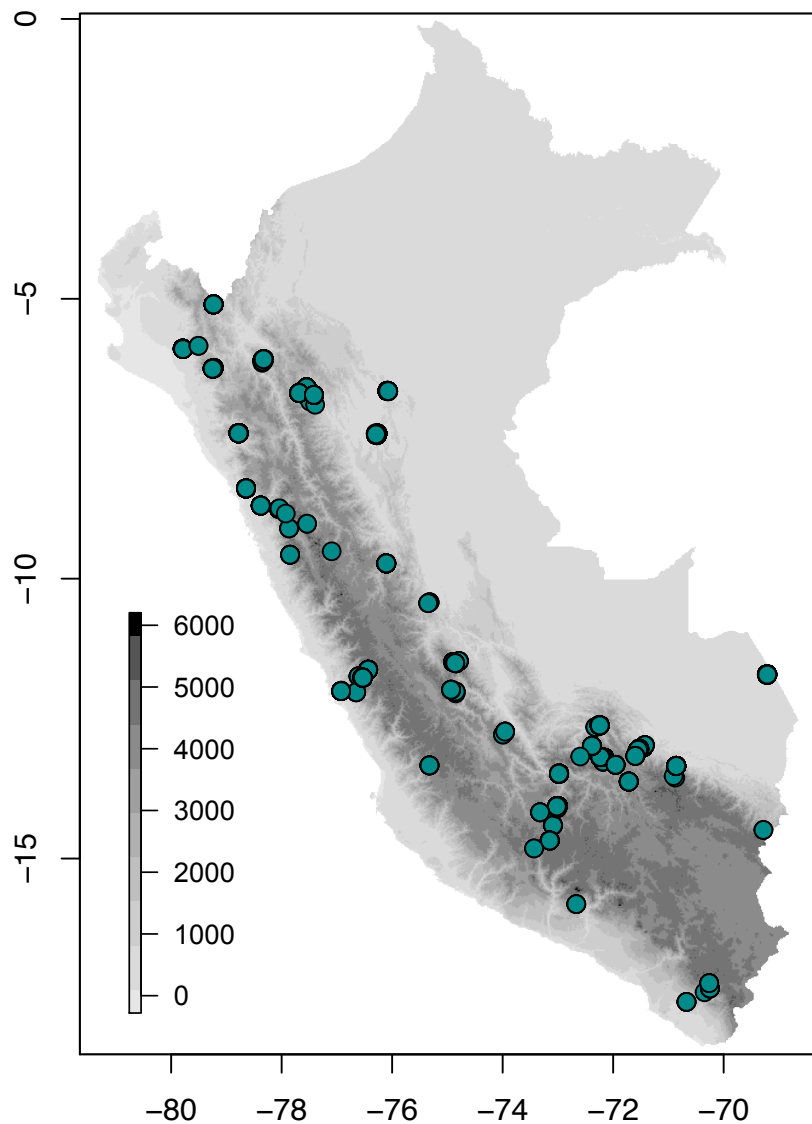

(b)

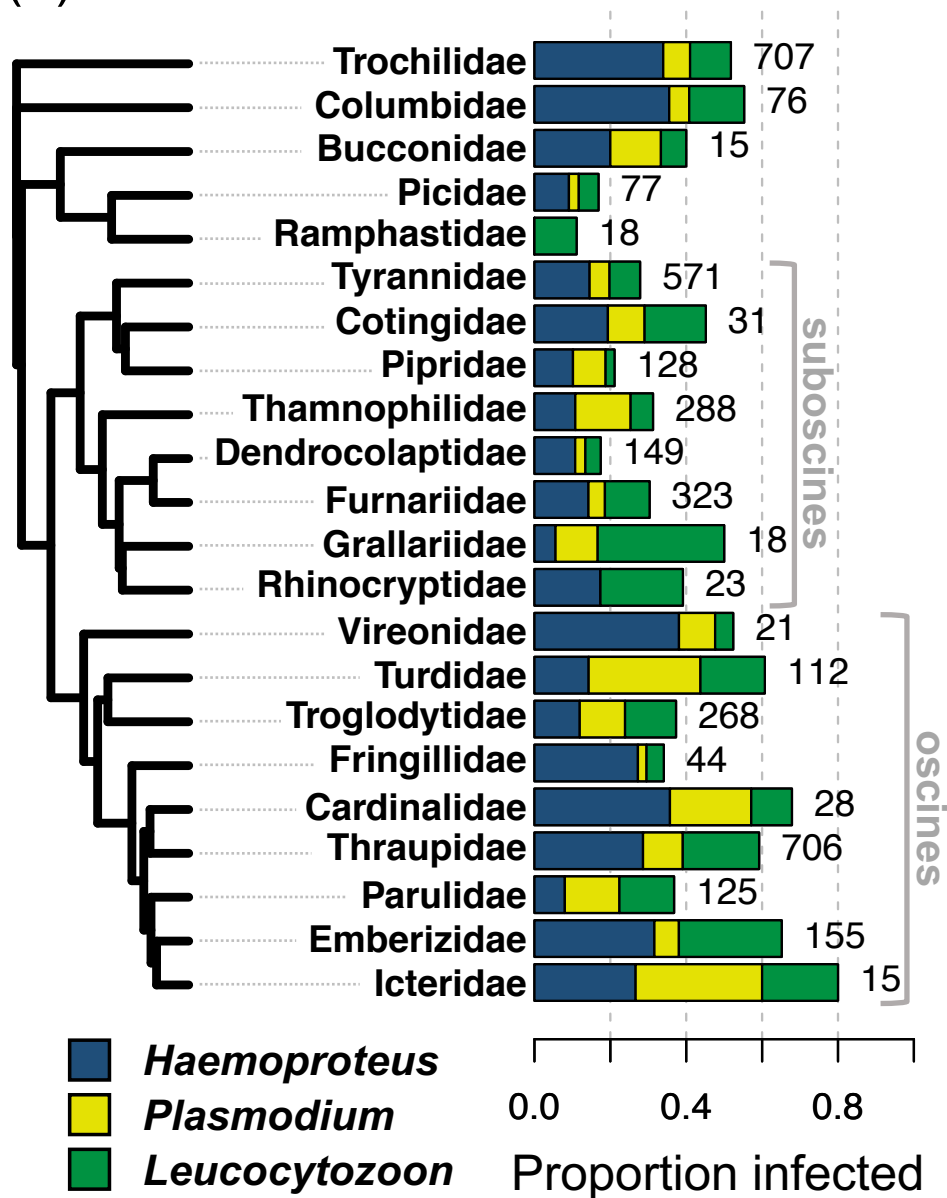

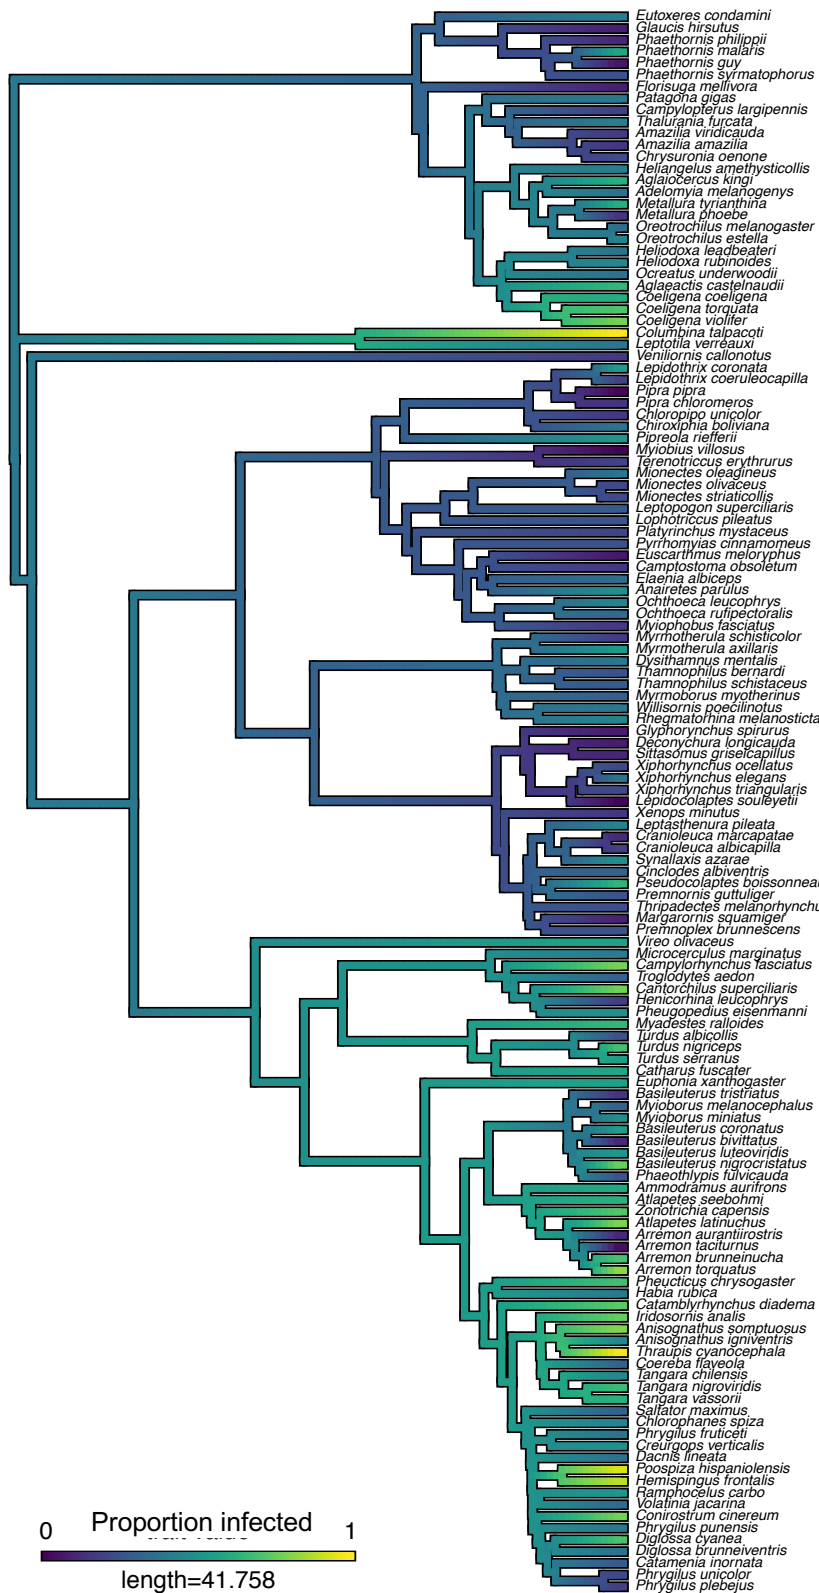

Trochilidae

Columbidae

Picidae

Pipridae

Cotingidae

Tyrannidae

Thamnophilidae

Dendrocolaptidae

Furnariidae

Vireonidae

Troglodytidae

Turdidae

Fringillidae

Parulidae

Emberizidae

Cardinalidae

Thraupidae

Apodiformes

suboscines

Passeriformes

oscines

- Eutoxeres condamini*
- Glaucis hirsutus*
- Phaethornis philippii*
- Phaethornis malais*
- Phaethornis guy*
- Phaethornis sylvatophorus*
- Florisuga mellivora*
- Cataglyphis gigas*
- Campylopterus largipennis*
- Thalurania furcata*
- Amazilia vindicauda*
- Amazilia amazilia*
- Chrysornis oenone*
- Helangelus amethysticollis*
- Agelaiocercus kingi*
- Astelomyia melanogenys*
- Metallura tyrannithra*
- Metallura phoebe*
- Oreotrochilus melanogaster*
- Oreotrochilus estella*
- Heliodoxa leadbeateri*
- Heliodoxa rubinoides*
- Oreatus underwoodii*
- Agelaius castelnauii*
- Coeligena coeligena*
- Coeligena torquata*
- Coeligena viollei*
- Columbiga talpacoti*
- Leptotila verreauxi*
- Veniliornis callonotus*
- Leptotrix coronata*
- Lepidotrix coerulescapilla*
- Pipra pipra*
- Pipra chloromeros*
- Chirogopo unicolor*
- Chiroxipha boliviana*
- Pipreola riefferii*
- Myiobius villosus*
- Pterinopus erythrus*
- Mionectes oleagineus*
- Mionectes olivaceus*
- Mionectes striatocollis*
- Leptopogon superciliosus*
- Lophotriccus pileatus*
- Platyrinchus mystaceus*
- Pyrirhynchus cinnamomeus*
- Euscarthmus meloryphus*
- Camptostoma obsoletum*
- Elaenia albiceps*
- Athyaetres parvulus*
- Ochthoeca leucophrys*
- Ochthoeca rufipectoralis*
- Myiophobus fasciatus*
- Myrmotherula schistocolor*
- Myrmotherula axillaris*
- Dysithamnus mentalis*
- Thamnophilus bernardi*
- Thamnophilus schistaceus*
- Myrmoborus myotherinus*
- Willisornis poecilinotus*
- Phedastornis melanosticta*
- Glycyhynchus spirurus*
- Deconychura longicauda*
- Sittasomus griseicapillus*
- Xiphorhynchus ocellatus*
- Xiphorhynchus elegans*
- Xiphorhynchus triangularis*
- Lepidocolaptes souleyetii*
- Xenops minutus*
- Leptasthenura pileata*
- Cranioleuca marcapatae*
- Cranioleuca albicapilla*
- Synallaxis azarae*
- Cincloides albiventris*
- Pseudocolaptes boissonneautii*
- Premnops guttifer*
- Thripadectes melanothorhynchus*
- Margarornis squamiger*
- Prefreux brunneus*
- Vireo olivaceus*
- Microcerculus marginatus*
- Campylorhynchus fasciatus*
- Troglodytes aedon*
- Cantorchilus superciliosus*
- Henicorhina leucophrys*
- Phleguopedius eisenmanni*
- Myadestes radioides*
- Turdus albicollis*
- Turdus nigricaps*
- Turdus serranus*
- Catharus fuscater*
- Euphonia xanthogaster*
- Basileuterus tristriatus*
- Myioborus melanocephalus*
- Myioborus minutus*
- Basileuterus coronatus*
- Basileuterus bivittatus*
- Basileuterus luteoviridis*
- Basileuterus nigrocrissatus*
- Phaethylipsis fulvicauda*
- Ammodramus aurifrons*
- Atlapetes seebolmi*
- Zonotrichia capensis*
- Atlapetes latinuchus*
- Arremon aurantirostris*
- Arremon lacustris*
- Arremon brunneinucha*
- Arremon torquatus*
- Phreuticus chrysogaster*
- Habia rubra*
- Catamblyrhynchus diadema*
- Iridosornis analis*
- Anisognathus somptuosus*
- Anisognathus igniventris*
- Thraupis cyanocephala*
- Coereba flaveola*
- Tangara chilensis*
- Tangara nigroviridis*
- Tangara vassorii*
- Salpator maximus*
- Chlorophanes spiza*
- Phrygilus fruticeti*
- Creurgops verticalis*
- Dacnis lineata*
- Pooecetes hispaniolensis*
- Hemispingus frontalis*
- Ramphocelus carbo*
- Volatinia jacarina*
- Conirostrum cinereum*
- Phrygilus punensis*
- Diglossa cyanea*
- Diglossa brunneiventris*
- Catamenia inornata*
- Phrygilus unicolor*
- Phrygilus plebejus*

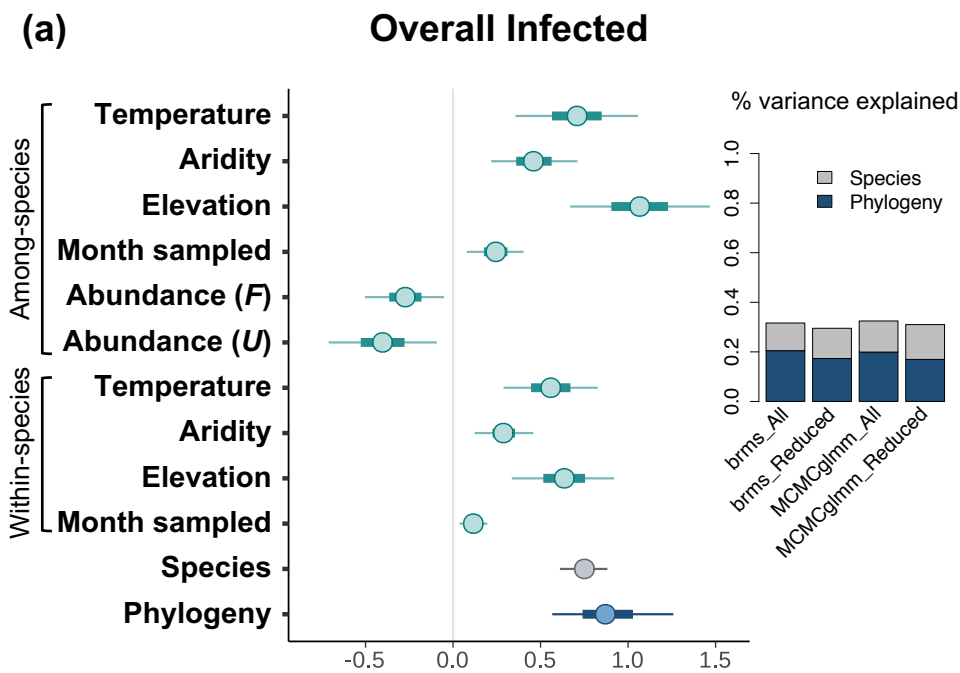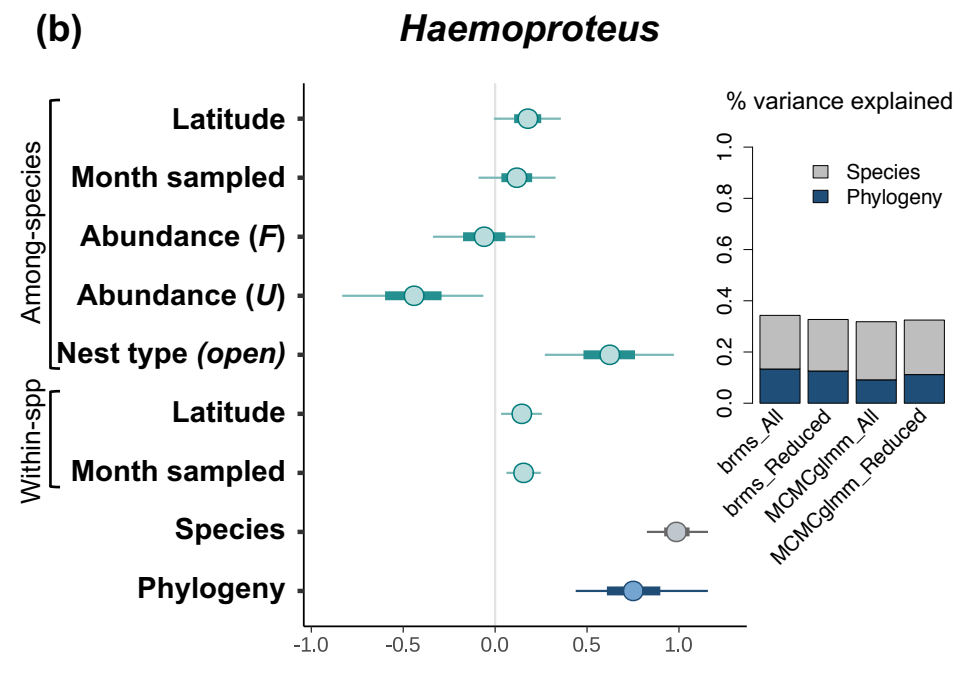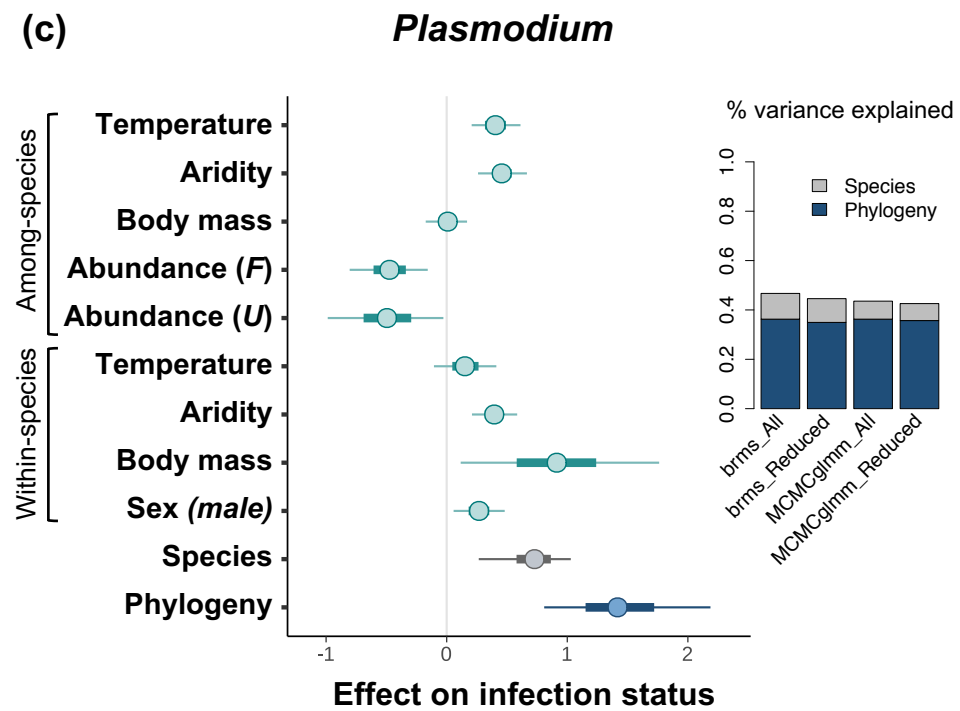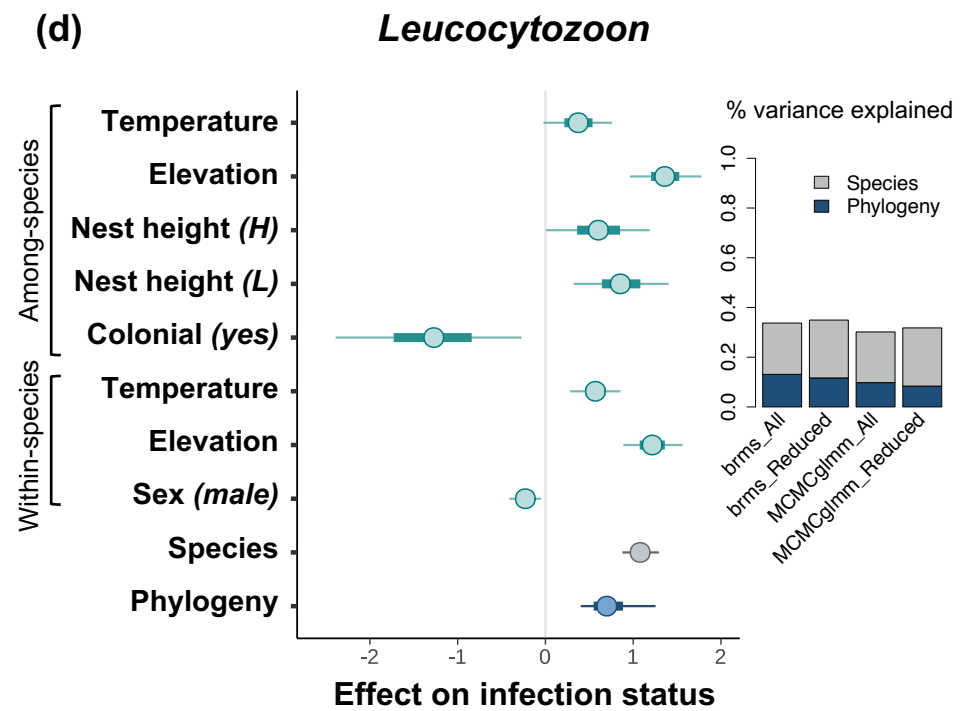

Source: https://www.biorxiv.org/content/10.1101/424549v1.full.pdf
